# Supplementary material
Source: PubMed Central journal article supplement (PMC7877245)
Supplement: NIHMS1649403-supplement-1.pdf [file NIHMS1649403-supplement-1.pdf]

**Supplemental Tables/Figures (for publication)**

**Supplemental Table S1: Demographics for the AAML1031 clinical trial (n-501)**

| <b>Variable</b>  | <b>Number (%)</b> |
|------------------|-------------------|
| Male             | 252 (50%)         |
| Female           | 249 (50%)         |
| Median Age (y)   | 11                |
| Race             |                   |
| Caucasian        | 396 (79%)         |
| African American | 61 (12%)          |
| Asian            | 23 (5%)           |
| Native American  | 5 (1%)            |
| Mixed            | 4 (1%)            |
| Unknown          | 12 (2%)           |
| Ethnicity        |                   |
| Hispanic         | 100 (20%)         |
| Non-Hispanic     | 401 (80%)         |

**\*Percentages may not add to 100% due to rounding.**

**Supplemental Table S2: Sample treatment conditions for each RPPA array**

**A. RPPA1**

| <b>Condition</b> | <b>Immediate/<br/>held/shipped</b> | <b>Collection<br/>tube</b> | <b>Transit temp</b> | <b>Pre/post<br/>chemotherapy</b> |
|------------------|------------------------------------|----------------------------|---------------------|----------------------------------|
| 1*               | immediate                          | heparin                    | N/A                 | pre                              |
| 2                | HELD                               | heparin                    | 4°C                 | pre                              |
| 3                | HELD                               | heparin                    | ambient             | pre                              |
| 4                | shipped                            | heparin                    | 4°C                 | pre                              |
| 5                | shipped                            | heparin                    | ambient             | pre                              |
| 6                | immediate                          | Cell Save                  | N/A                 | pre                              |
| 7                | HELD                               | Cell Save                  | ambient             | pre                              |
| 8                | immediate                          | heparin                    | N/A                 | Post                             |
| 9                | immediate                          | Cell Save                  | N/A                 | Post                             |
| 10               | HELD                               | heparin                    | ambient             | Post                             |

\*Conditions 1-5 were run in RPPA1. Conditions 6-10 were run in RPPA2.

**B. RPPA2**

| <b>Condition</b> | <b>Immediate/<br/>held/shipped</b> | <b>Collection<br/>tube</b> | <b>Transit temp</b> | <b>Pre/post<br/>chemotherapy</b> |
|------------------|------------------------------------|----------------------------|---------------------|----------------------------------|
| 1                | immediate                          | Cell Save                  | N/A                 | pre                              |
| 2                | HELD                               | Cell Save                  | 4 <sup>0</sup> C    | pre                              |
| 3                | shipped                            | Cell Save                  | 4 <sup>0</sup> C    | pre                              |
| 4                | immediate                          | heparin                    | N/A                 | pre                              |
| 5                | immediate                          | Cell Save                  | N/A                 | 6h post                          |
| 6                | HELD                               | Cell Save                  | 4 <sup>0</sup> C    | 6h post                          |
| 7                | shipped                            | Cell Save                  | 4 <sup>0</sup> C    | 6h post                          |
| 8                | immediate                          | heparin                    | N/A                 | 6h post                          |
| 9                | immediate                          | Cell Save                  | N/A                 | 24h post                         |
| 10               | HELD                               | Cell Save                  | 4 <sup>0</sup> C    | 24h post                         |
| 11               | Shipped                            | Cell Save                  | 4 <sup>0</sup> C    | 24h post                         |
| 12               | Immediate                          | Heparin                    | N/A                 | 24h post                         |

**B. RPPA3-AAML1031 clinical trial feasibility set**

|   | <b>Condition</b> | <b>Tube type</b> | <b>Pre/post chemotherapy</b> |
|---|------------------|------------------|------------------------------|
| 1 | Shipped          | Cell Save        | pre                          |
| 2 | Shipped          | Cell Save        | 10h post                     |
| 3 | shipped          | Cell Save        | 24h post                     |

**Supplemental Table S3: Transit times and shipping conditions for samples in experiment 1**

| <b>Condition</b><br><b>Sample</b> | <u>Cond 1:</u><br>immediate | <u>Cond 2:</u><br>Held<br>4°C | <u>Cond 3:</u><br>Held<br>RT | <u>Cond 4:</u><br>Shipped<br>4°C | <u>Cond 5:</u><br>Shipped<br>RT |
|-----------------------------------|-----------------------------|-------------------------------|------------------------------|----------------------------------|---------------------------------|
| Patient 1-PB <sup>1</sup>         | <6h                         | ND                            | 24h                          | ND                               | 24h                             |
| Patient 2-PB                      | <6h                         | 24h                           | 24h                          | 24h                              | 24h                             |
| Patient 3-BM <sup>2</sup>         | 30h                         | 72h                           | 72h                          | 72h                              | 72h                             |
| Patient 4-PB                      | 16h                         | 72h                           | 72h                          | 72h                              | 72h                             |
| Patient 5a-BM                     | <6h                         | 24h                           | 24h                          | 24h                              | 24h                             |
| Patient 5b-PB                     | 36h                         | 48h                           | 48h                          | 48h                              | 48h                             |
| Patient 6-BM                      | <6h                         | 24h                           | 24h                          | 24h                              | 24h                             |
| Patient 7-PB                      | <6h                         | 24h                           | 24h                          | 24h                              | 24h                             |

<sup>1</sup>PB = peripheral blood, BM = bone marrow aspirate

**Table S4: Diagnosis, transit times and shipping conditions for samples in experiment 2:**

| sample name | Dg.   | Pre-treatment |      |      | Post-treatment 6h |      |      | Post-treatment 24h |      |      |
|-------------|-------|---------------|------|------|-------------------|------|------|--------------------|------|------|
|             |       | immediate     | hold | ship | immediate         | hold | ship | immediate          | hold | ship |
| RPA33       | B-ALL | 1             | 25   | 25   | 14                | 38   | 38   | 5                  | 29   | 29   |
| RPA29       | B-ALL | 1             | 73   | 73   | 1                 | 25   | 25   | 17                 | 41   | 41   |
| RPA34       | B-ALL | 1             | 73   | 73   | 3                 | 27   | 27   | 14                 | 38   | 38   |
| RPA22       | AML   | 2             | 18   | 18   | 2                 | 26   | 26   | 11                 | 35   | 35   |
| RPA30       | CML   | 2             | 26   | 26   | 1                 | 25   | 25   | 6                  | 30   | 30   |
| RPA11       | B-ALL | 2             | 26   | 26   | 2                 | 26   | 26   | 6                  | 30   | 30   |
| RPA16       | AML   | 2             | 26   | 26   | 2                 | 32   | 32   | 12                 | 36   | 36   |
| RPA17       | B-ALL | 2             | 26   | 26   | 2                 | 16   | --   | --                 | --   | --   |
| RPA18       | B-ALL | 2             | 26   | 26   | 3                 | 32   | 32   | 4                  | 28   | 28   |
| RPA23       | B-ALL | 2             | 26   | 26   | 6                 | 30   | 30   | 6                  | 30   | 30   |
| RPA35       | T-ALL | 2             | 26   | --   | 2                 | 24   | --   | 2                  | 26   | --   |
| RPA20       | T-ALL | 2             | 27   | 27   | 9                 | 71   | 71   | 1                  | 49   | 49   |
| RPA31       | T-ALL | 2             | 74   | 74   | 12                | 60   | 60   | 16                 | 40   | 40   |
| RPA12       | AML   | 3             | 27   | 27   | 10                | 34   | 32   | 10                 | 34   | 34   |
| RPA27       | T-ALL | 4             | 28   | --   | 2                 | 26   | --   | 6                  | 30   | --   |
| RPA13       | B-ALL | 6             | 30   | 30   | 6                 | 27   | 27   | 6                  | 30   | 30   |
| RPA24       | B-ALL | 6             | 30   | --   | 6                 | 30   | --   | 2                  | 25   | --   |
| RPA14       | B-ALL | 9             | 33   | 33   | --                | 9    | 57   | 3                  | 27   | 51   |
| RPA28       | AML   | 11            | 35   | 35   | 2                 | 26   | 26   | 12                 | 36   | 36   |
| RPA32       | B-ALL | 16            | 64   | 66   | 6                 | 36   | 36   | 3                  | 24   | 24   |
| RPA25       | AML   | 30            | 54   | 54   | 2                 | 26   | 50   | 12                 | 84   | 84   |
| RPA15       | B-ALL | 2             | 21   | 21   | 6                 | 36   | 36   | 2                  | 23   | 23   |

- sample not collected

**Table S5: Transit times for the feasibility set (clinical trial samples) in experiment group 3**

| <b>Table S5: Transit times for test set of clinical trial samples (RPPA3)</b> |           |            |            |
|-------------------------------------------------------------------------------|-----------|------------|------------|
| <b>Sample</b>                                                                 | <b>0h</b> | <b>10h</b> | <b>24h</b> |
| 1                                                                             | 24        | 36         | 24         |
| 2                                                                             | 42        | 32         | 18         |
| 3                                                                             | 32        | 22         | 32         |
| 4                                                                             | 24        | 104        | 90         |
| 5                                                                             | 86        | 76         | 62         |
| 6                                                                             | 40        | 30         | 20         |
| 7                                                                             | 96        | 86         | 72         |
| 8                                                                             | 24        | 84         | 60         |
| 9                                                                             | 48        | 38         | 24         |
| 10                                                                            | 36        | 27         | 96         |
| 11                                                                            | 48        | 38         | 36         |
| 12                                                                            | 24        | 96         | 72         |
| 13                                                                            | 28        | 40         | 20         |
| 14                                                                            | 24        | 24         | 18         |
| 15                                                                            | 24        | 38         | 48         |
| 16                                                                            | 48        | 38         | 24         |
| 17                                                                            | 1         | 1          | 10         |

**Supplemental Table S6: Antibodies used for each array:**

| <b>RPPA1</b>     | <b>RPPA2</b>      | <b>RPPA3-feasibility set</b> | <b>RPPA3-full set</b> |
|------------------|-------------------|------------------------------|-----------------------|
| Actin            | Actin             | Actin                        | Cyclin D1             |
| AKT              | AKT               | AKT                          | eIF2S1                |
| AKT-p308         | AKT-p308          | AKT-p308                     | eIF2S1-p51            |
| AKT-p473         | AKT-p473          | AKT-p473                     | FOXO3                 |
| Caspase 3        | Caspase 3         | Caspase 3                    | FOXO3-p318            |
| Cleaved caspase3 | Caspase 3-Cleaved | Cleaved caspase 3            | MAP2K1                |
| ERK2             | ERK2              | CDK4                         | MAP2K1-p217           |
| Erk2-p           | ERK2-p            | Grp78                        | MAPK1                 |
| HSP90            | HSP90             |                              | MAPK1-p202            |
| MEK              | MEK               |                              | Mcl1                  |
| MEK-p            | MEK-p             |                              | MTOR                  |
|                  | NF-κB             |                              | MTOR-p2448            |
| P53              | P53               | P53                          | NR4A1                 |
| P53-p15          | P53-p15           | P53-p15                      | Parp1                 |
| PI3K-p85         | PI3K-p85          |                              | Parp1-cleaved         |
| PI3K-p110        | PI3K-p110         |                              | PTEN                  |
| Rb               | Rb                | Rb                           | STAT3                 |
| Rb-p807          | Rb-p807           | Rb-p807                      | STAT3-p705            |
|                  |                   |                              | STAT3-p727            |
|                  |                   |                              | TCF4                  |

**Figure S1:**

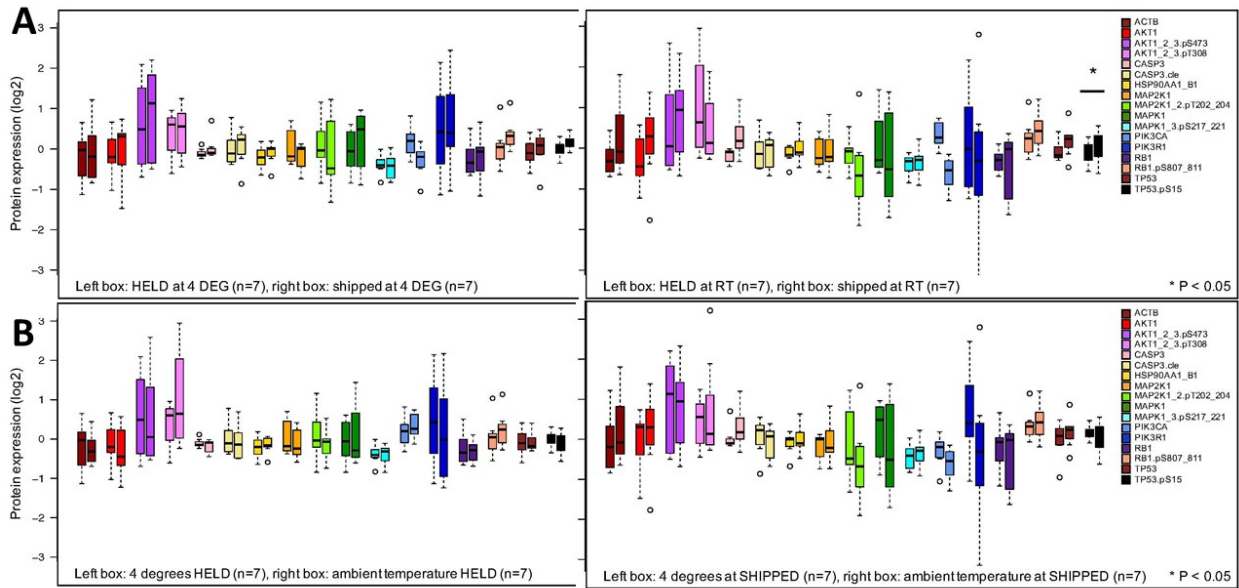

**Figure S1 legend:** Median protein concentrations with range (25-75%) and outliers (open circles) for 17 antibodies across 7 patients (RPPA1) **A.** Comparison of held samples (right box of each pair) to shipped samples (left box of each pair) at 4°C (left panel) or ambient temperature (RT) (right panel). **B.** Comparison of samples held at either 4°C or RT (left panel) and a comparison of shipped samples at either 4°C or RT



Figure S2

A

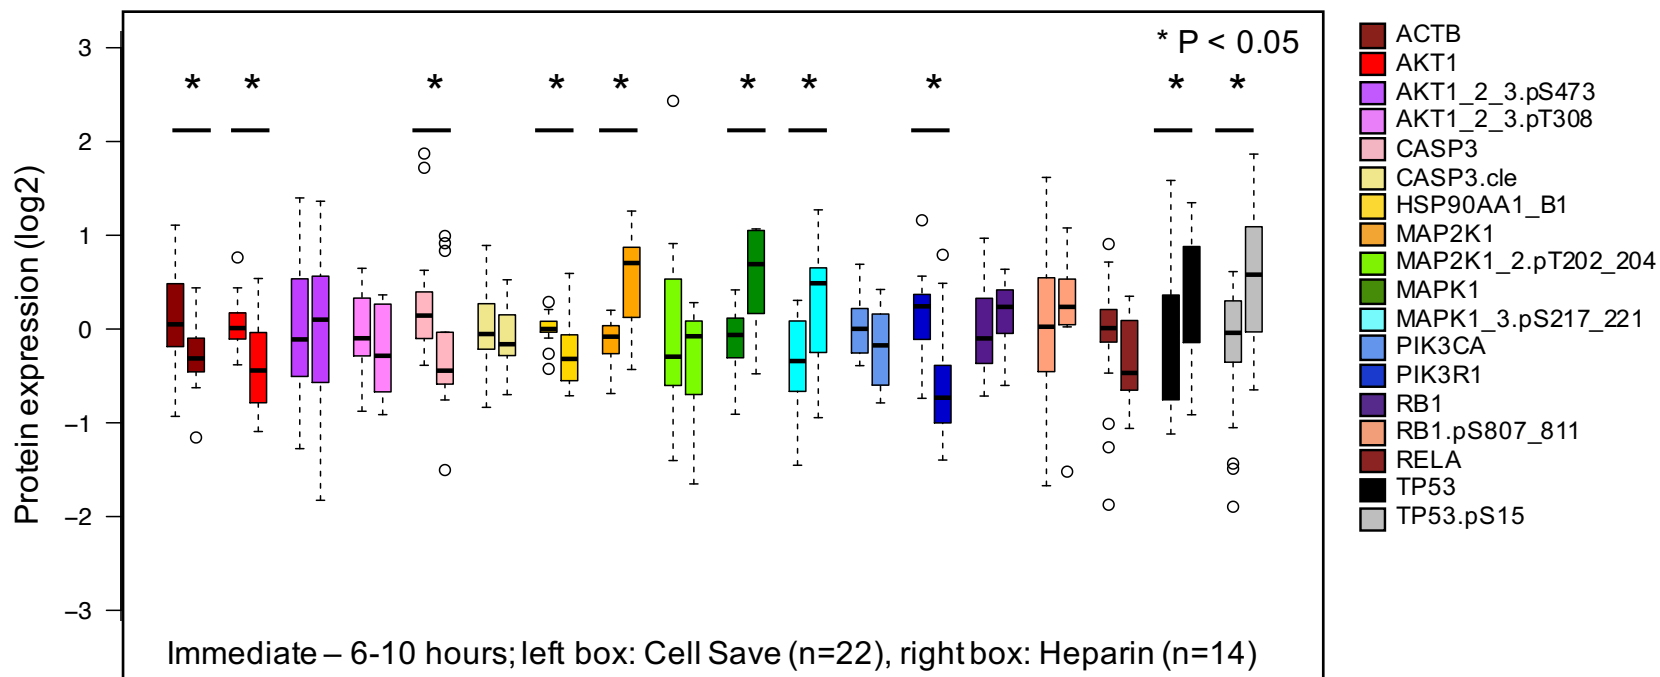

B

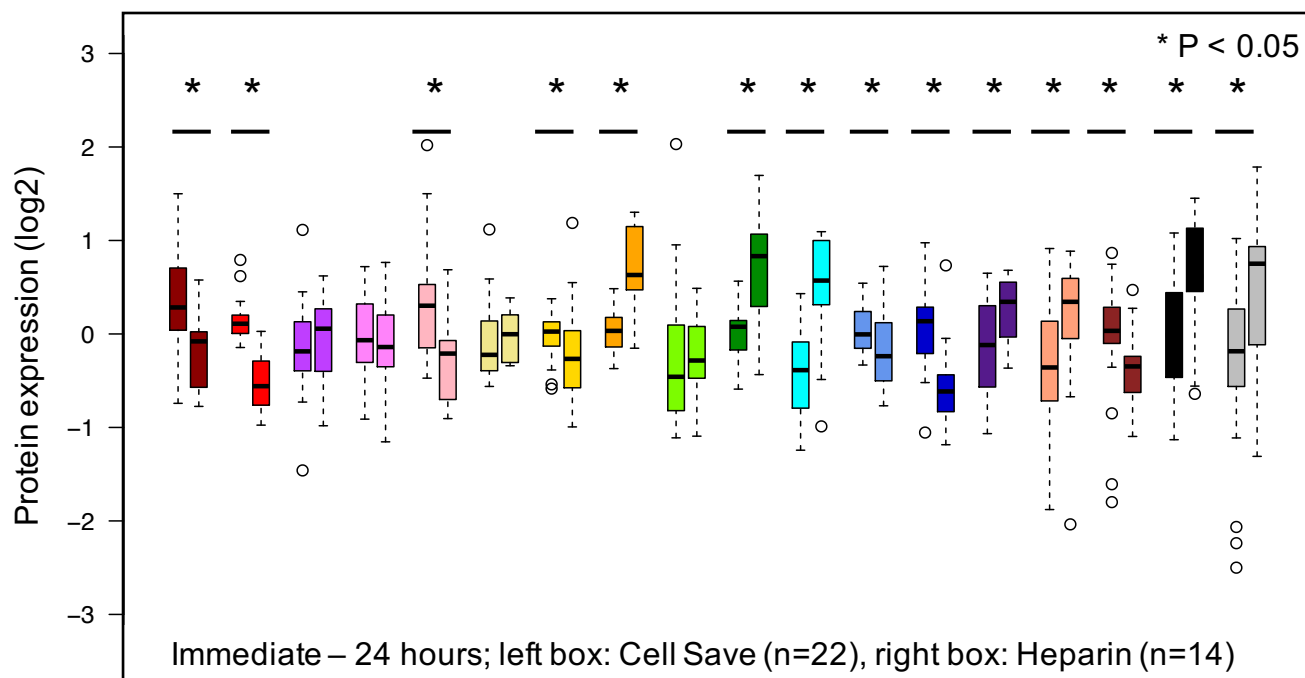

Figure S3

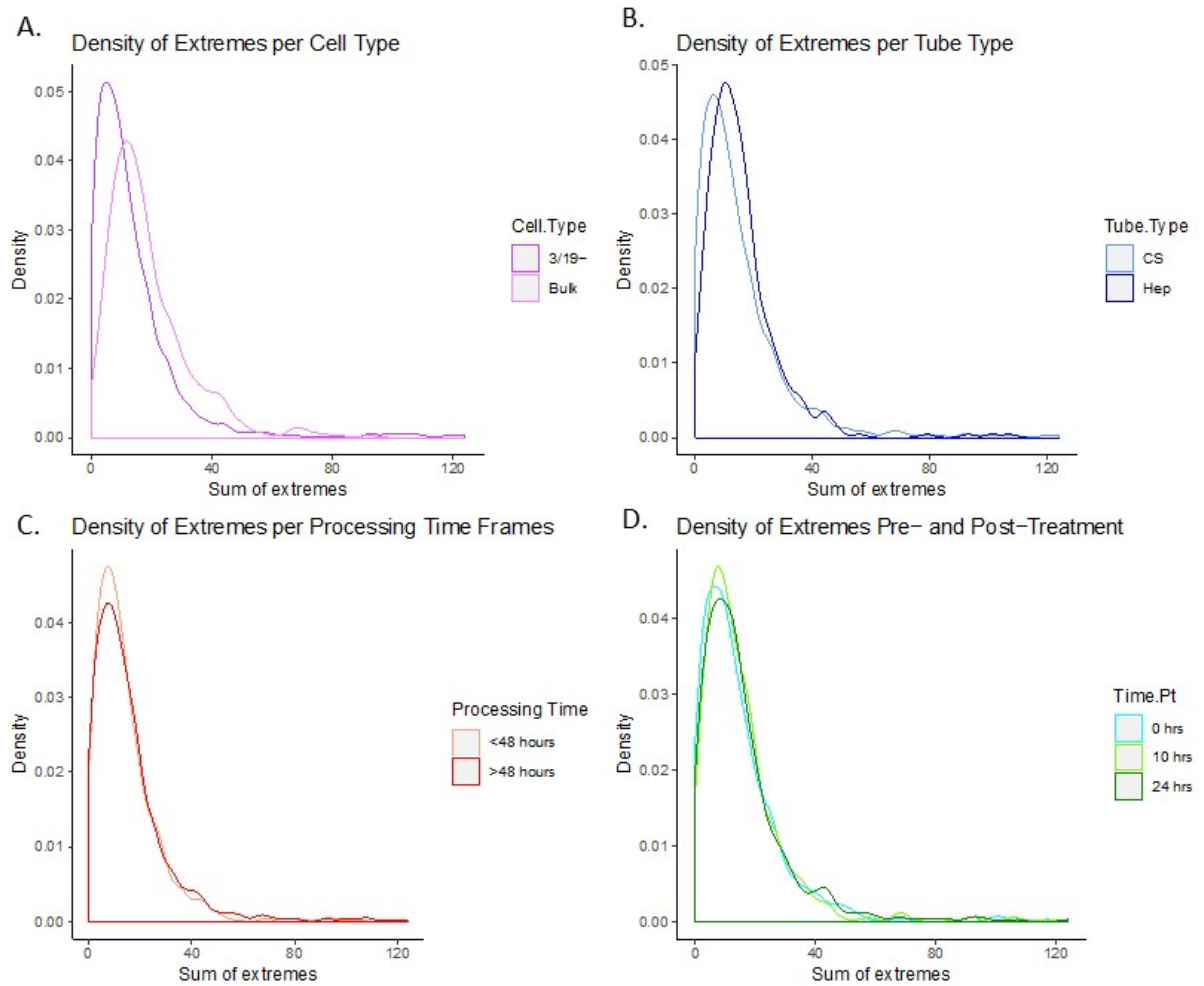

**Figure S3 legend:** Density plots showing the sum of extremes between (A) bulk AML cells after sucrose centrifugation vs. magnetic depletion with CD3/19, (B) Cell Save (CS) preservation tubes vs. heparin, (C) transit time between collection from patient and processing, (D) sample collection time: pre-chemotherapy (0h), 10h and 24h after the start of systemic chemotherapy. There were no significant differences between all comparisons.
